# Supplementary material for: Multicomponent Transition Metal Dichalcogenide Nanosheets for Imaging‐Guided Photothermal and Chemodynamic Therapy
Source: PubMed Central journal article supplement (PMC7709983; doi:10.1002/advs.202000272), 2020-09-30
Supplement: ADVS-7-2000272-s001.pdf [file ADVS-7-2000272-s001.pdf]

## Supporting Information

**Multicomponent Transition Metal Dichalcogenide Nanosheets for Imaging-Guided Photothermal and Chemodynamic Therapy**

*Yu Zhu,<sup>‡</sup> Yingjie Wang,<sup>‡</sup> Gareth R. Williams, Liyang Fu, Jingjing Wu, Hui Wang, Ruizheng Liang,\* Xisheng Weng,\* Min Wei\**

Y. Zhu, L. Fu, J. Wu, H. Wang, Dr. R. Liang, Prof. M. Wei  
State Key Laboratory of Chemical Resource Engineering, Beijing Advanced Innovation Center for Soft Matter Science and Engineering, Beijing University of Chemical Technology, Beijing 100029, P. R. China  
E-mail: liangrz@mail.buct.edu.cn (Dr. R. Liang); weimin@mail.buct.edu.cn (Prof. M. Wei)

Y. Wang, Prof. X. Weng  
Department of Orthopaedics, Peking Union Medical College Hospital, Peking Union Medical College & Chinese Academy of Medical Sciences, Beijing 100730, China  
E-mail: xshweng@medmail.com.cn (Prof. X. Weng)

Dr. G. R. Williams  
UCL School of Pharmacy, University College London, 29-39 Brunswick Square, London WC1N 1AX, UK

<sup>‡</sup> These authors contributed equally to this work.

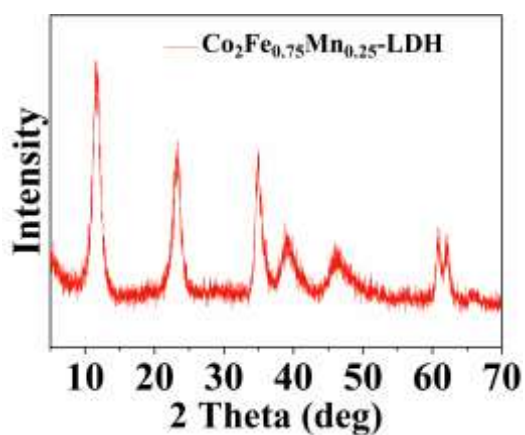

**Figure S1.** XRD pattern of CoFeMn-LDH precursor with Co: Fe: Mn = 2: 0.75: 0.25.

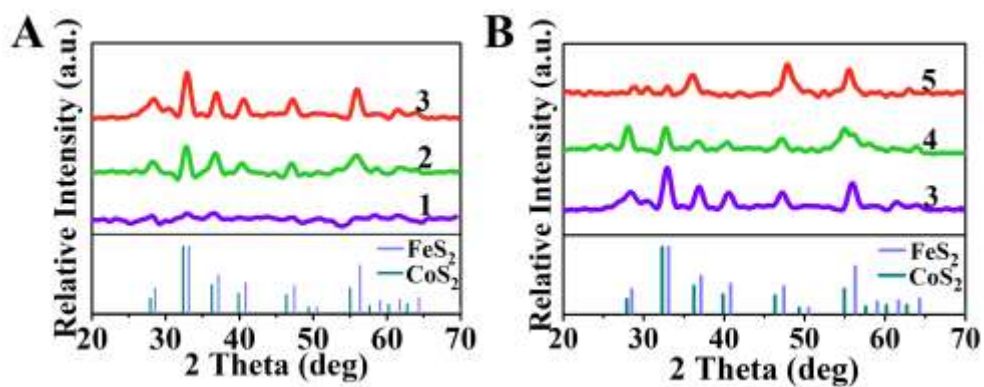

**Figure S2.** XRD patterns of CFMS NSs with Co: Fe: Mn = 1: 0.25: 0.75 (line 1), 1: 0.5: 0.5 (line 2), 1: 0.75: 0.25 (line 3), 2: 0.75: 0.25 (line 4), and 3: 0.75: 0.25 (line 5).

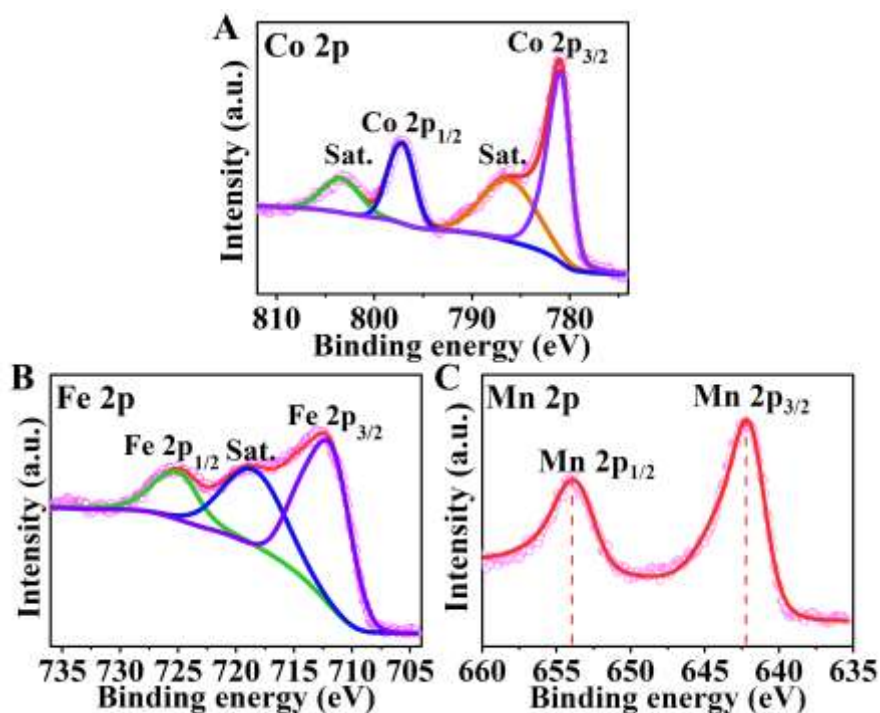

**Figure S3.** XPS spectra of the A) Co  $2p$ , B) Fe  $2p$ , C) Mn  $2p$  regions for  $\text{Co}_2\text{Fe}_{0.75}\text{Mn}_{0.25}$ -LDH.

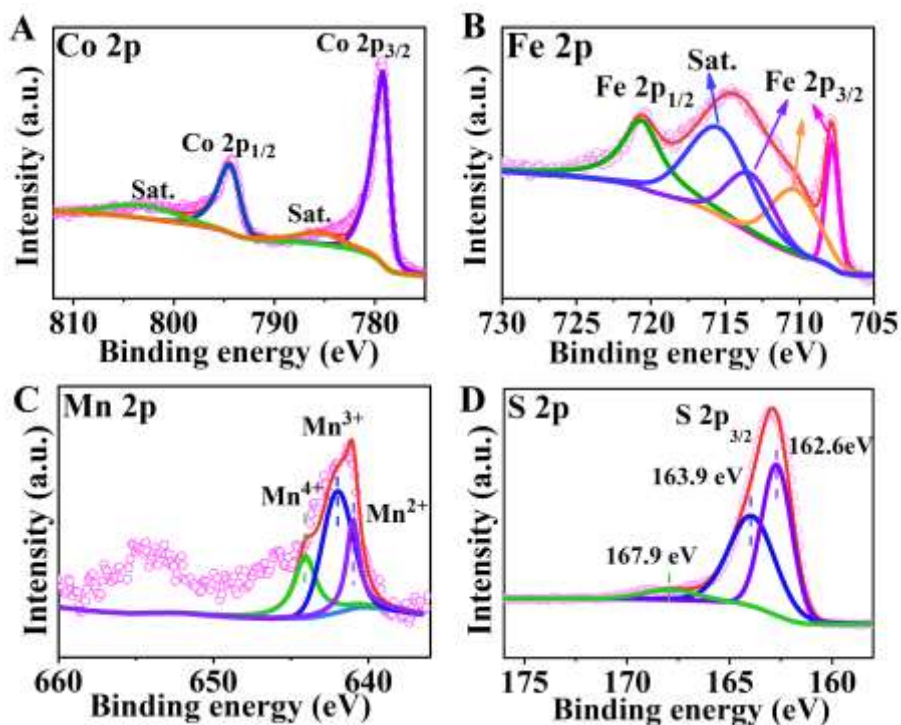

**Figure S4.** XPS spectra of the A) Co  $2p$ , B) Fe  $2p$ , C) Mn  $2p$ , D) S  $2p$  regions for CFMS NSs (Co: Fe: Mn = 2: 0.75: 0.25).

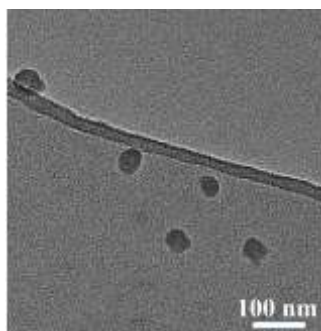

**Figure S5.** TEM image of CFMS-PVP NSs (Co: Fe: Mn = 2: 0.75: 0.25).

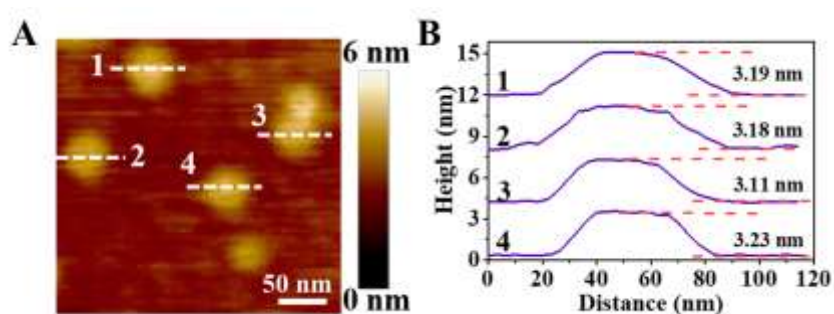

**Figure S6.** A) AFM image and B) measured thickness of CFMS-PVP NSs (Co: Fe: Mn = 2: 0.75: 0.25).

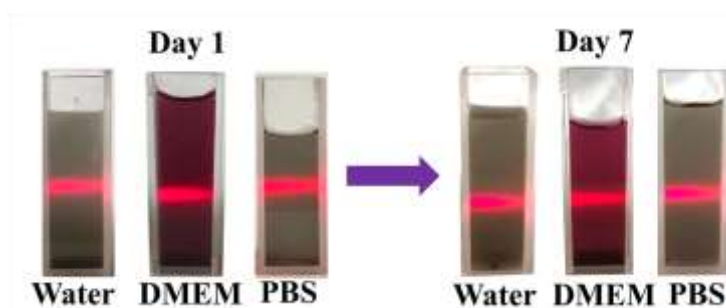

**Figure S7.** The Tyndall effect of  $\text{Co}_2\text{Fe}_{0.75}\text{Mn}_{0.25}\text{S}_6$ -PVP NSs in water, DMEM and PBS from Day 1 to Day 7.

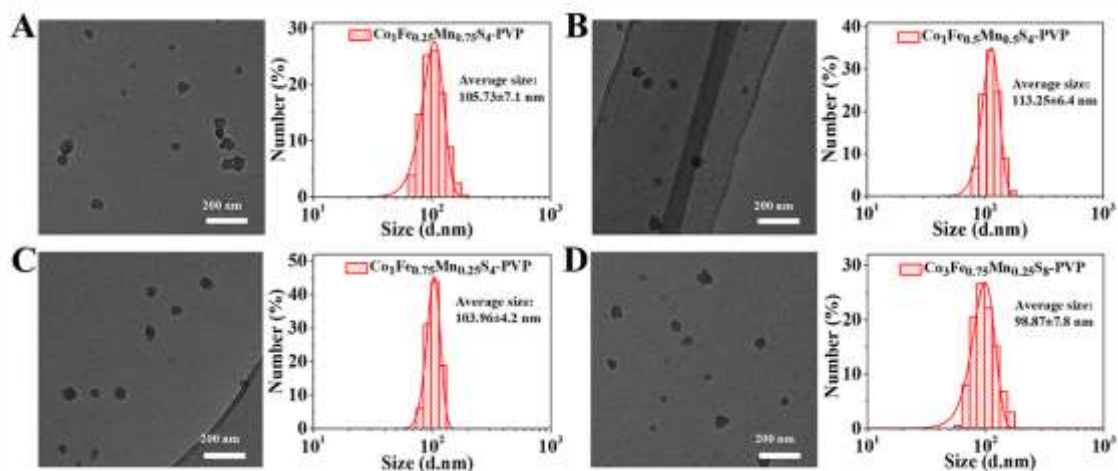

**Figure S8.** TEM image and corresponding size distribution of CFMS-PVP NSs with various ratios A) Co: Fe: Mn = 1: 0.25: 0.75, B) Co: Fe: Mn = 1: 0.5: 0.5, C) Co: Fe: Mn = 1: 0.75: 0.25, D) Co: Fe: Mn = 3: 0.75: 0.25.

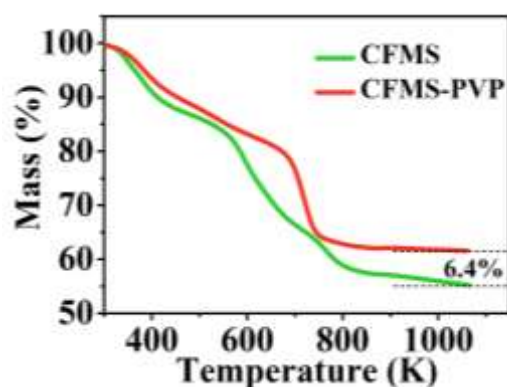

**Figure S9.** Thermogravimetric curves of CFMS and CFMS-PVP NSs (Co: Fe: Mn = 2: 0.75: 0.25).

**Table S1.** Chemical composition of CFMS-PVP NSs with various molar ratios of Co/Fe/Mn and S/(Co + Fe + Mn), based on ICP results.

| CFMS-PVP      | Co/Fe/Mn    | S/Metal |
|---------------|-------------|---------|
| 1/0.25/0.75/4 | 1/0.28/0.74 | 2.11    |
| 1/0.5/0.5/4   | 1/0.61/0.57 | 2.05    |
| 1/0.75/0.25/4 | 1/0.68/0.24 | 2.07    |
| 2/0.75/0.25/6 | 2/0.76/0.28 | 2.31    |
| 3/0.75/0.25/8 | 3/0.81/0.27 | 2.21    |

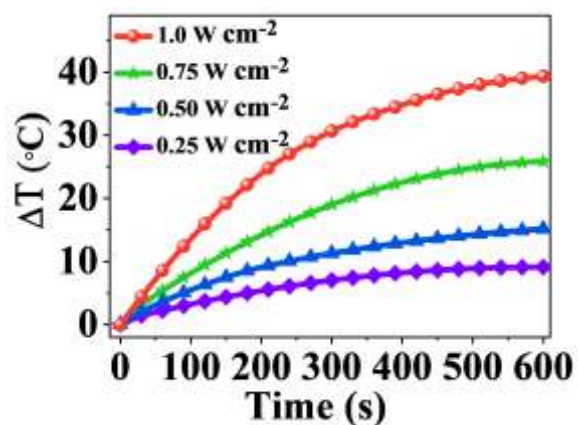

**Figure S10.** Temperature profiles of  $\text{Co}_2\text{Fe}_{0.75}\text{Mn}_{0.25}\text{S}_6$ -PVP NSs dispersion ( $50 \mu\text{g mL}^{-1}$ ) under 808 nm laser irradiation at various power densities ( $0.25$ ,  $0.50$ ,  $0.75$ , and  $1.0 \text{ W cm}^{-2}$ ).

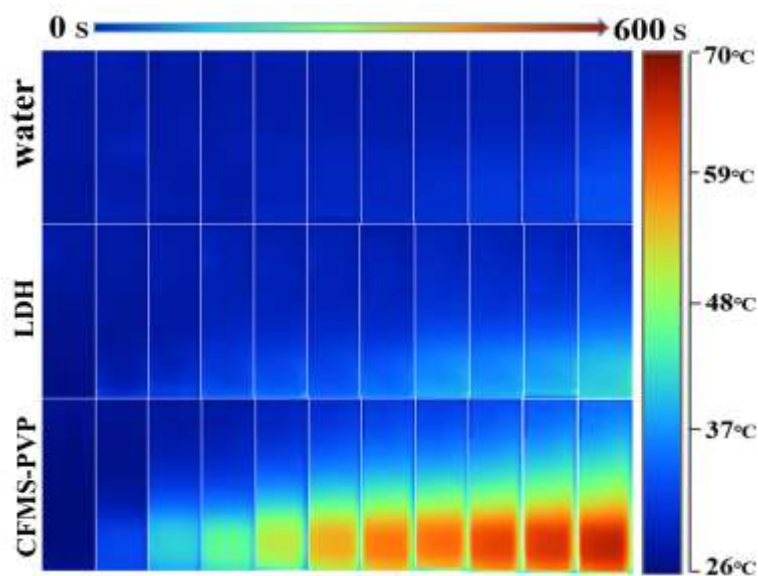

**Figure S11.** The photothermal photographs of water,  $\text{Co}_2\text{Fe}_{0.75}\text{Mn}_{0.25}$ -LDH precursor, CFMS-PVP NSs (Co: Fe: Mn = 2: 0.75: 0.25) detected by a thermal infrared imaging device.

**Table S2.** Photothermal conversion efficiency ( $\eta$ ) of different PTT agents reported in the literature.

| Photothermal agent                                                      | $\eta$ (%) | Size          | Refs                                                       |
|-------------------------------------------------------------------------|------------|---------------|------------------------------------------------------------|
| MoS <sub>2</sub> -PEG NSs                                               | 32.96%     | ~80 nm        | <i>ACS Nano.</i> 13, 2544–2557 (2019)                      |
| WS <sub>2</sub> -PVP NSs                                                | 36.9%      | ~200 nm       | <i>Adv. Funct. Mater.</i> 29, 1901722 (2019)               |
| TaS <sub>2</sub> -PEG NSs                                               | 39.0%      | 110 nm        | <i>Adv. Funct. Mater.</i> 27, 1703261 (2017)               |
| Ti <sub>0.71</sub> Ta <sub>0.29</sub> S <sub>y</sub> O <sub>z</sub> NSs | 39.2%      | 0.2~2 $\mu$ m | <i>Angew. Chem. Int. Ed.</i> 56, 7842 – 7846 (2017)        |
| Cu <sub>2</sub> Se                                                      | 50.89%     | ~86.89 nm     | <i>Chem. Mater.</i> 31, 6174–6186 (2019)                   |
| Cu-Fe-Se NSs                                                            | 78.9%      | 70 nm         | <i>ACS Appl. Mater. Interfaces.</i> 10, 43396–43404 (2018) |
| ReS <sub>2</sub> NSs                                                    | 79.2%      | ~100 nm       | <i>Small.</i> 14, 1703789 (2018)                           |
| CFMS-PVP NSs                                                            | 89.0%      | ~60.0 nm      | This work                                                  |

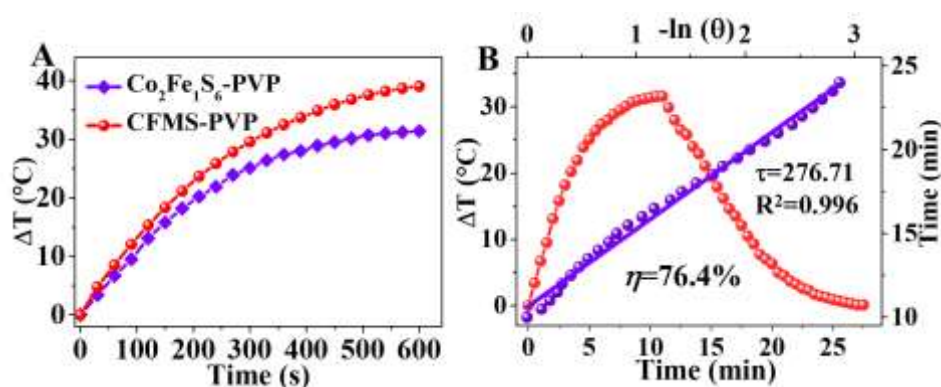

**Figure S12.** A) Photothermal heating curves of Co<sub>2</sub>Fe<sub>0.75</sub>Mn<sub>0.25</sub>S<sub>6</sub>-PVP NSs and Co<sub>2</sub>Fe<sub>1</sub>S<sub>6</sub>-PVP NSs. B) Calculation of the photothermal conversion efficiency for Co<sub>2</sub>Fe<sub>1</sub>S<sub>6</sub>-PVP NSs at 808 nm. The time constant ( $\tau_s$ ) for the heat transfer was calculated from the cooling period (purple line).

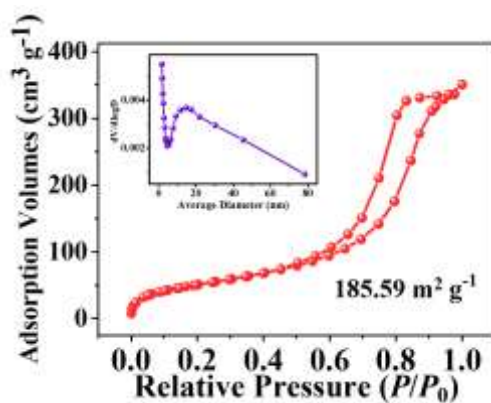

**Figure S13.**  $N_2$  adsorption-desorption isotherm of the  $Co_2Fe_{0.75}Mn_{0.25}S_6$ -PVP NSs. Inset: corresponding pore size distribution.

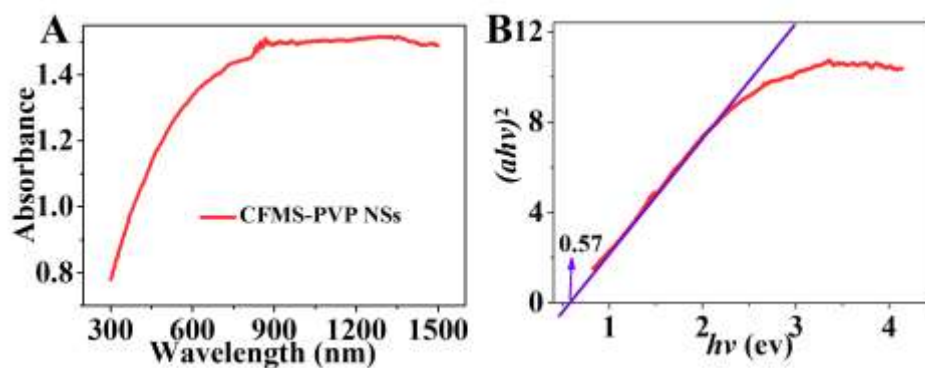

**Figure S14.** A) Diffuse reflection spectrum of the solid  $Co_2Fe_{0.75}Mn_{0.25}S_6$ -PVP NSs. B) The responding Tauc plot of  $(ah\nu)^2$  vs. photons energy ( $h\nu$ ).

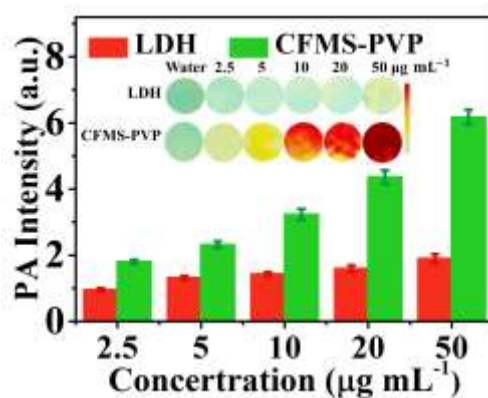

**Figure S15.** PA intensity of  $Co_2Fe_{0.75}Mn_{0.25}S_6$ -PVP NSs and  $Co_2Fe_{0.75}Mn_{0.25}$ -LDH aqueous suspensions at various concentrations (2.5, 5, 10, 20, and 50  $\mu\text{g mL}^{-1}$  from left to right). Data are given as mean  $\pm$  S.D. ( $n = 3$ ).



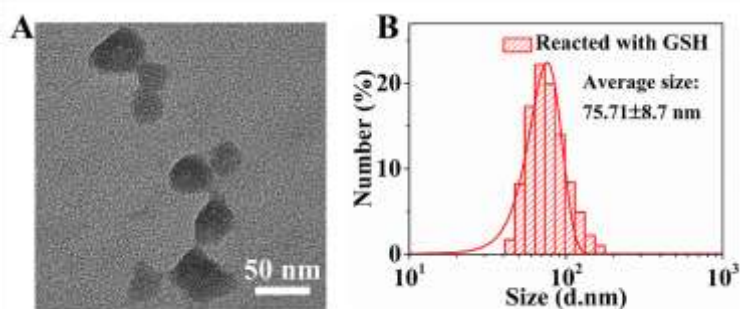

**Figure S16.** TEM image and corresponding size distribution of  $\text{Co}_2\text{Fe}_{0.75}\text{Mn}_{0.25}\text{S}_6$ -PVP NSs ( $50 \mu\text{g mL}^{-1}$ ) reacted with GSH ( $1.0 \text{ mM}$ ).

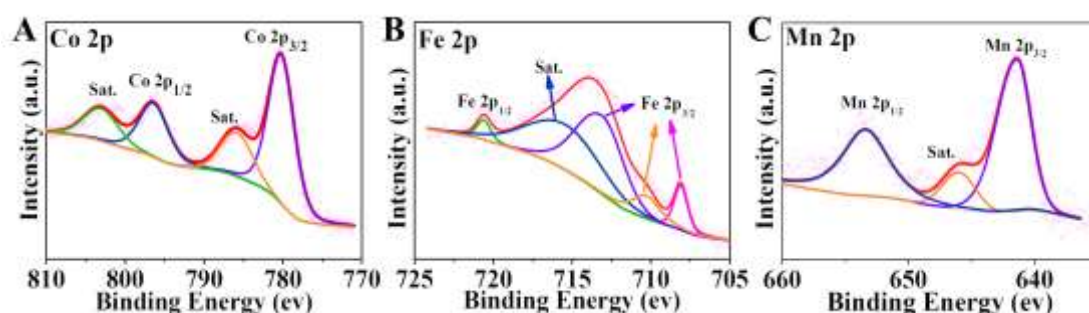

**Figure S17.** A) Co  $2p$ , B) Fe  $2p$ , C) Mn  $2p$  XPS spectra for CFMS-PVP NSs (Co: Fe: Mn = 2: 0.75: 0.25) after GSH treatment.

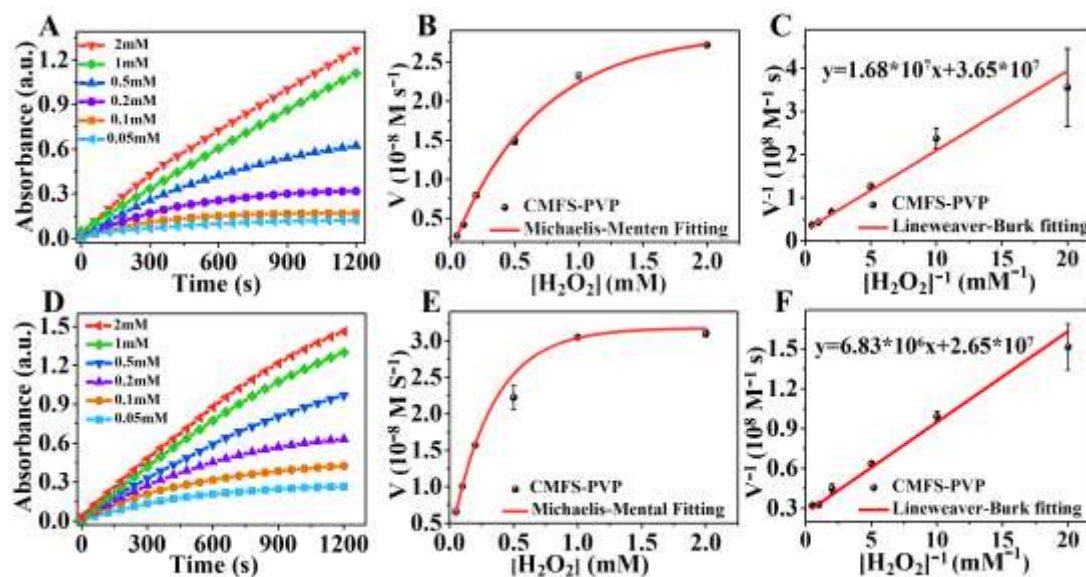

**Figure S18.** Fenton reactions occurring in the presence of  $\text{Co}_2\text{Fe}_{0.75}\text{Mn}_{0.25}\text{S}_6$ -PVP NSs. Michaelis-Menten steady-state kinetics upon the addition of varied concentration of  $\text{H}_2\text{O}_2$  (0.05, 0.1, 0.2, 0.5, 1.0 and 2.0 mM) are shown at 298 K (A-C) and 318 K (D-F). Data are plotted as mean  $\pm$  S.D. ( $n = 3$ ).

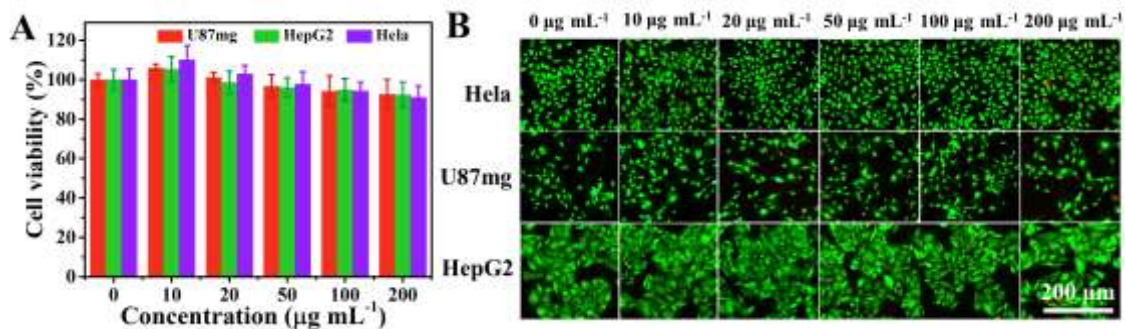

**Figure S19.** Cell viability of HeLa, U87mg, and HepG2 cells incubated with various concentrations of  $\text{Co}_2\text{Fe}_{0.75}\text{Mn}_{0.25}\text{S}_6$ -PVP NSs. (Data are given as mean  $\pm$  S.D,  $n = 6$ ).

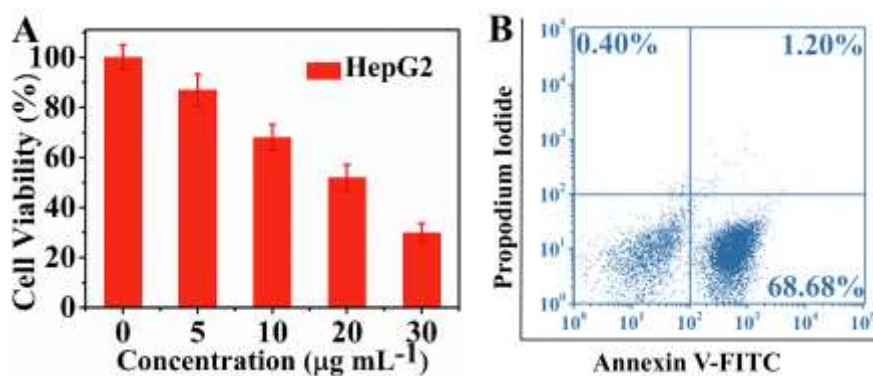

**Figure S20.** A) Relative viabilities of HepG2 cells after incubation with different concentrations of  $\text{Co}_2\text{Fe}_{0.75}\text{Mn}_{0.25}\text{S}_6$ -PVP NSs and 808 nm laser irradiation at  $1.0 \text{ W cm}^{-2}$  for 8 min. B) Cell apoptosis analysis using the Annexin V-FITC/PI double staining method with 808 nm laser irradiation at  $1.0 \text{ W cm}^{-2}$  for 8 min.

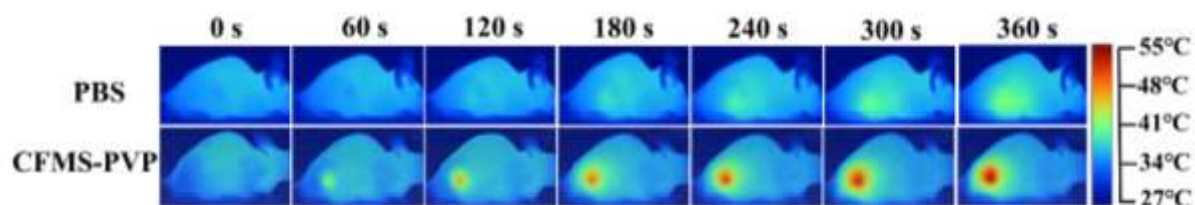

**Figure S21.** Thermal infrared imaging at the tumor site of HepG2-tumor bearing mice exposed to 808 nm laser irradiation for 6 min at 8 h post injection.

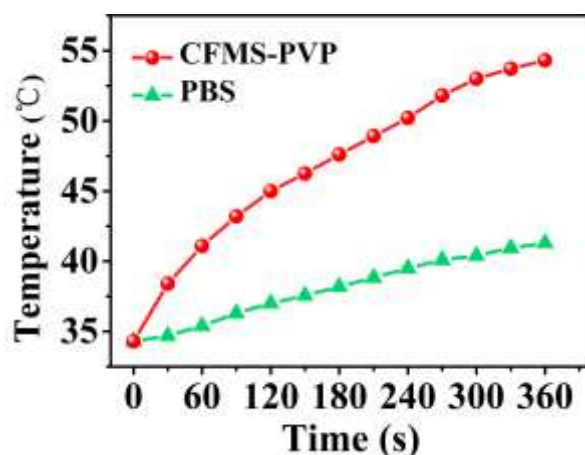

**Figure S22.** Temperature rise on tumors of mice administered by *i.v.* injection with PBS, and  $\text{Co}_2\text{Fe}_{0.75}\text{Mn}_{0.25}\text{S}_6$ -PVP NSs under 808 nm laser irradiation at  $1.0 \text{ W cm}^{-2}$  for 6 min.

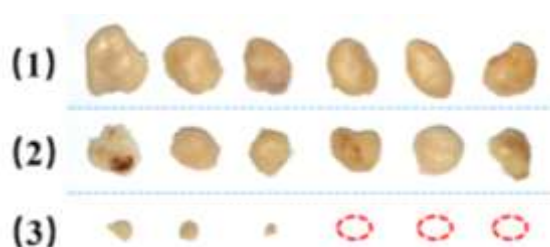

**Figure S23.** Digital photographs of the excised tumors from each group after 16 days of therapy. Groups: (1) PBS + NIR (6 min irradiation, control group), (2) CFMS-PVP NSs (CDT alone), (3) CFMS-PVP NSs + NIR (6 min irradiation, PTT/CDT).

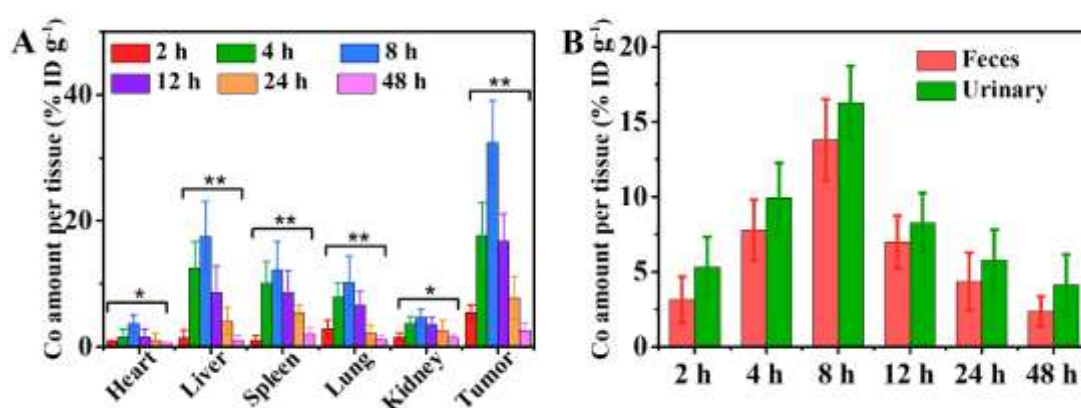

**Figure S24.** A) The distribution of the  $\text{Co}_2\text{Fe}_{0.75}\text{Mn}_{0.25}\text{S}_6$ -PVP NSs in various organs as a function of time, determined by measuring Co concentrations. B) Excretion of the CFMS-PVP NSs, again quantified *via* Co concentration. Data are presented as mean  $\pm$  S.D,  $n = 3$ . P values in (A) were calculated by ANOVA followed by Tukey's post-test (\* $P < 0.05$ , \*\* $P < 0.01$ ).

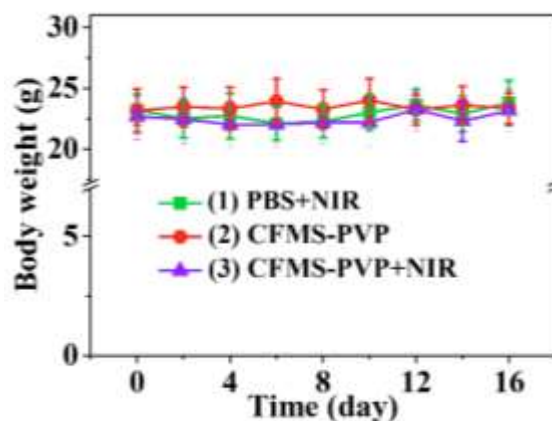

**Figure S25.** Body weight changes of HepG2 tumor bearing mice as a function of time after various treatments. Data are presented as mean  $\pm$  S.D, n = 6.

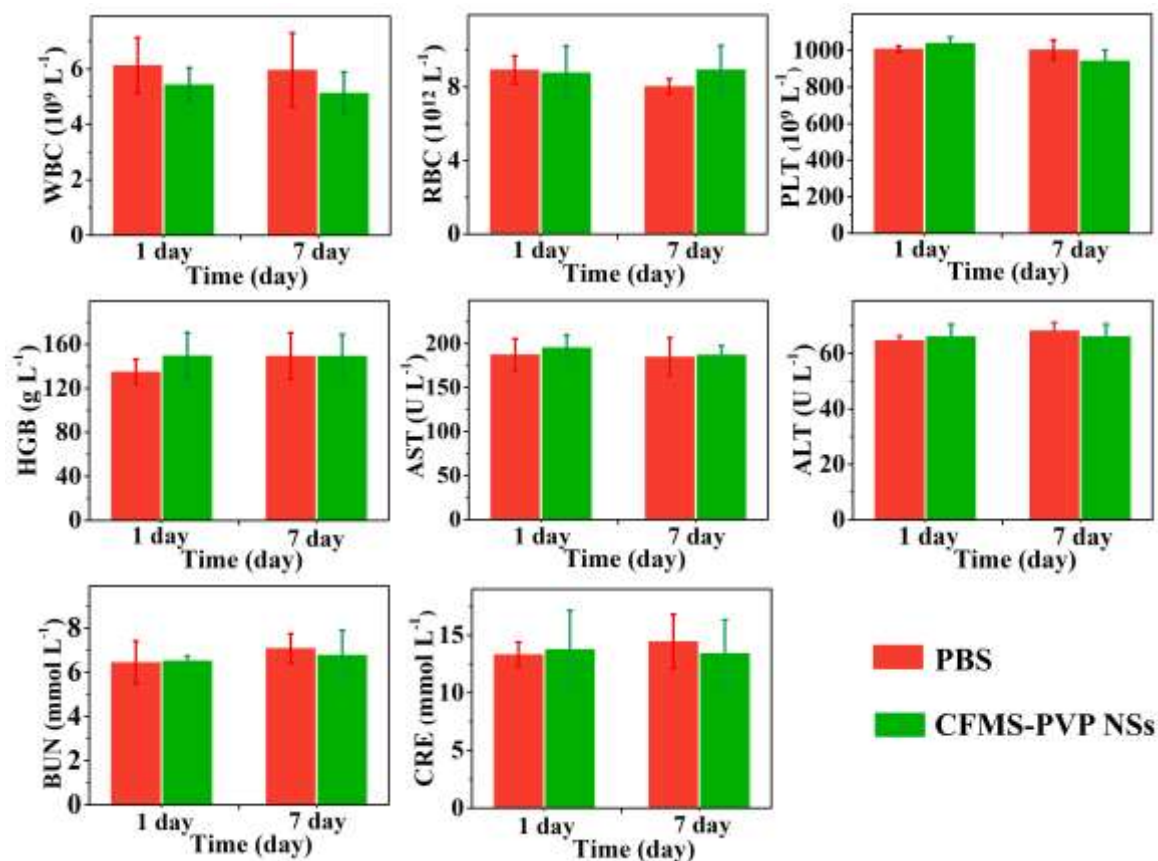

**Figure S26.** Kidney and liver function markers and blood cell counts of nude mice bearing HepG2 tumors after injection of PBS (control) and CFMS-PVP NSs. Data are presented as mean  $\pm$  S.D, n = 3.

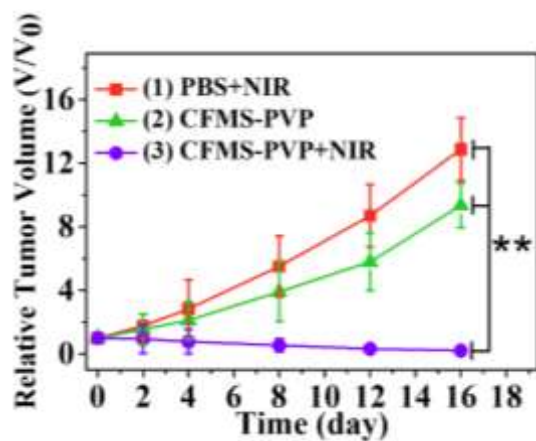

**Figure S27.** Relative tumor volume of 4T1-Fluc-tumor-bearing mice after different treatments. Data are presented as mean  $\pm$  S.D,  $n = 4$ . P values were calculated by ANVOA followed by Tukey's post-test (\* $P < 0.05$ , \*\* $P < 0.01$ ).
